# Supplementary material
Source: publisher site journal article supplement (https://spandidos-publications.com/6708/downloadSupplementary)
Supplement: Supplementary file 1 [file downloadSupplementary]

## Sheet: Table S3
Table SIII. KEGG enrichment of differentially expressed ferroptosis-related genes in GSE108417 dataset.
#Term	Database	ID	Input number	Background number	P-Value	Corrected P-Value	Input	Hyperlink
Kaposi sarcoma-associated herpesvirus infection	KEGG PATHWAY	mmu05167	8	217	1.93e-10	1.43e-08	CXCL2|PIK3CA|RB1|IL6|ATG3|VEGFA|MAPK9|KRAS	http://www.genome.jp/kegg-bin/show_pathway?mmu05167/mmu:16653%09red/mmu:26420%09red/mmu:67841%09red/mmu:22339%09red/mmu:20310%09red/mmu:19645%09red/mmu:18706%09red/mmu:16193%09red
Autophagy - animal	KEGG PATHWAY	mmu04140	7	130	2.28e-10	1.43e-08	PIK3CA|HMGB1|PRKAA2|PRKAA1|ATG3|MAPK9|KRAS	http://www.genome.jp/kegg-bin/show_pathway?mmu04140/mmu:16653%09red/mmu:26420%09red/mmu:105787%09red/mmu:15289%09red/mmu:67841%09red/mmu:18706%09red/mmu:108079%09red
FoxO signaling pathway	KEGG PATHWAY	mmu04068	7	132	2.53e-10	1.43e-08	PIK3CA|ATM|PRKAA2|PRKAA1|IL6|MAPK9|KRAS	http://www.genome.jp/kegg-bin/show_pathway?mmu04068/mmu:16653%09red/mmu:26420%09red/mmu:105787%09red/mmu:18706%09red/mmu:16193%09red/mmu:11920%09red/mmu:108079%09red
Fluid shear stress and atherosclerosis	KEGG PATHWAY	mmu05418	7	143	4.32e-10	1.84e-08	PIK3CA|HMOX1|PRKAA2|PRKAA1|VEGFA|MAPK9|CAV1	http://www.genome.jp/kegg-bin/show_pathway?mmu05418/mmu:26420%09red/mmu:15368%09red/mmu:105787%09red/mmu:22339%09red/mmu:12389%09red/mmu:18706%09red/mmu:108079%09red
AGE-RAGE signaling pathway in diabetic complications	KEGG PATHWAY	mmu04933	6	101	2.76e-09	9.37e-08	PIK3CA|IL6|VEGFA|NOX4|MAPK9|KRAS	http://www.genome.jp/kegg-bin/show_pathway?mmu04933/mmu:16653%09red/mmu:26420%09red/mmu:22339%09red/mmu:50490%09red/mmu:18706%09red/mmu:16193%09red
Insulin resistance	KEGG PATHWAY	mmu04931	6	110	4.49e-09	1.27e-07	PIK3CA|PRKAA2|SLC2A1|IL6|PRKAA1|MAPK9	http://www.genome.jp/kegg-bin/show_pathway?mmu04931/mmu:26420%09red/mmu:20525%09red/mmu:105787%09red/mmu:18706%09red/mmu:16193%09red/mmu:108079%09red
HIF-1 signaling pathway	KEGG PATHWAY	mmu04066	6	114	5.51e-09	1.34e-07	PIK3CA|HMOX1|SLC2A1|IL6|TFRC|VEGFA	http://www.genome.jp/kegg-bin/show_pathway?mmu04066/mmu:20525%09red/mmu:15368%09red/mmu:22339%09red/mmu:18706%09red/mmu:16193%09red/mmu:22042%09red
Human T-cell leukemia virus 1 infection	KEGG PATHWAY	mmu05166	7	246	1.63e-08	3.38e-07	PIK3CA|ATM|RB1|IL6|SLC2A1|MAPK9|KRAS	http://www.genome.jp/kegg-bin/show_pathway?mmu05166/mmu:16653%09red/mmu:26420%09red/mmu:20525%09red/mmu:19645%09red/mmu:18706%09red/mmu:16193%09red/mmu:11920%09red
Insulin signaling pathway	KEGG PATHWAY	mmu04910	6	140	1.79e-08	3.38e-07	SOCS1|PIK3CA|PRKAA2|PRKAA1|MAPK9|KRAS	http://www.genome.jp/kegg-bin/show_pathway?mmu04910/mmu:16653%09red/mmu:26420%09red/mmu:12703%09red/mmu:105787%09red/mmu:18706%09red/mmu:108079%09red
Pancreatic cancer	KEGG PATHWAY	mmu05212	5	75	3.66e-08	6.23e-07	PIK3CA|MAPK9|VEGFA|RB1|KRAS	http://www.genome.jp/kegg-bin/show_pathway?mmu05212/mmu:18706%09red/mmu:16653%09red/mmu:26420%09red/mmu:19645%09red/mmu:22339%09red
MicroRNAs in cancer	KEGG PATHWAY	mmu05206	7	282	4.05e-08	6.26e-07	SOCS1|CD44|ATM|HMOX1|VEGFA|ZEB1|KRAS	http://www.genome.jp/kegg-bin/show_pathway?mmu05206/mmu:16653%09red/mmu:12703%09red/mmu:15368%09red/mmu:22339%09red/mmu:21417%09red/mmu:12505%09red/mmu:11920%09red
Pathways in cancer	KEGG PATHWAY	mmu05200	8	535	1.83e-07	2.59e-06	PIK3CA|HMOX1|RB1|IL6|VEGFA|SLC2A1|MAPK9|KRAS	http://www.genome.jp/kegg-bin/show_pathway?mmu05200/mmu:16653%09red/mmu:26420%09red/mmu:20525%09red/mmu:15368%09red/mmu:22339%09red/mmu:19645%09red/mmu:18706%09red/mmu:16193%09red
Ferroptosis	KEGG PATHWAY	mmu04216	4	41	2.23e-07	2.91e-06	TFRC|HMOX1|GCLC|SLC7A11	http://www.genome.jp/kegg-bin/show_pathway?mmu04216/mmu:26570%09red/mmu:14629%09red/mmu:22042%09red/mmu:15368%09red
TNF signaling pathway	KEGG PATHWAY	mmu04668	5	113	2.58e-07	3.13e-06	IL6|PIK3CA|CXCL2|TNFAIP3|MAPK9	http://www.genome.jp/kegg-bin/show_pathway?mmu04668/mmu:18706%09red/mmu:20310%09red/mmu:21929%09red/mmu:26420%09red/mmu:16193%09red
Epstein-Barr virus infection	KEGG PATHWAY	mmu05169	6	230	3.07e-07	3.48e-06	PIK3CA|RB1|IL6|TNFAIP3|CD44|MAPK9	http://www.genome.jp/kegg-bin/show_pathway?mmu05169/mmu:26420%09red/mmu:21929%09red/mmu:19645%09red/mmu:12505%09red/mmu:18706%09red/mmu:16193%09red
Non-alcoholic fatty liver disease (NAFLD)	KEGG PATHWAY	mmu04932	5	151	1.03e-06	1.06e-05	IL6|PIK3CA|MAPK9|PRKAA2|PRKAA1	http://www.genome.jp/kegg-bin/show_pathway?mmu04932/mmu:18706%09red/mmu:26420%09red/mmu:105787%09red/mmu:108079%09red/mmu:16193%09red
Longevity regulating pathway - multiple species	KEGG PATHWAY	mmu04213	4	62	1.06e-06	1.06e-05	PIK3CA|PRKAA2|PRKAA1|KRAS	http://www.genome.jp/kegg-bin/show_pathway?mmu04213/mmu:18706%09red/mmu:16653%09red/mmu:105787%09red/mmu:108079%09red
mTOR signaling pathway	KEGG PATHWAY	mmu04150	5	155	1.17e-06	1.1e-05	PIK3CA|SLC7A5|PRKAA2|PRKAA1|KRAS	http://www.genome.jp/kegg-bin/show_pathway?mmu04150/mmu:18706%09red/mmu:16653%09red/mmu:20539%09red/mmu:105787%09red/mmu:108079%09red
Central carbon metabolism in cancer	KEGG PATHWAY	mmu05230	4	67	1.42e-06	1.22e-05	PIK3CA|SLC7A5|SLC2A1|KRAS	http://www.genome.jp/kegg-bin/show_pathway?mmu05230/mmu:18706%09red/mmu:16653%09red/mmu:20539%09red/mmu:20525%09red
Hepatitis B	KEGG PATHWAY	mmu05161	5	163	1.48e-06	1.22e-05	IL6|PIK3CA|MAPK9|RB1|KRAS	http://www.genome.jp/kegg-bin/show_pathway?mmu05161/mmu:18706%09red/mmu:16653%09red/mmu:26420%09red/mmu:19645%09red/mmu:16193%09red
Renal cell carcinoma	KEGG PATHWAY	mmu05211	4	68	1.5e-06	1.22e-05	PIK3CA|VEGFA|SLC2A1|KRAS	http://www.genome.jp/kegg-bin/show_pathway?mmu05211/mmu:18706%09red/mmu:16653%09red/mmu:20525%09red/mmu:22339%09red
Adipocytokine signaling pathway	KEGG PATHWAY	mmu04920	4	71	1.77e-06	1.37e-05	MAPK9|SLC2A1|PRKAA1|PRKAA2	http://www.genome.jp/kegg-bin/show_pathway?mmu04920/mmu:26420%09red/mmu:20525%09red/mmu:105787%09red/mmu:108079%09red
Prolactin signaling pathway	KEGG PATHWAY	mmu04917	4	72	1.87e-06	1.38e-05	PIK3CA|MAPK9|SOCS1|KRAS	http://www.genome.jp/kegg-bin/show_pathway?mmu04917/mmu:18706%09red/mmu:16653%09red/mmu:26420%09red/mmu:12703%09red
Necroptosis	KEGG PATHWAY	mmu04217	5	177	2.2e-06	1.56e-05	CHMP5|MAPK9|IL33|TNFAIP3|HMGB1	http://www.genome.jp/kegg-bin/show_pathway?mmu04217/mmu:26420%09red/mmu:21929%09red/mmu:77125%09red/mmu:15289%09red/mmu:76959%09red
Cellular senescence	KEGG PATHWAY	mmu04218	5	186	2.78e-06	1.82e-05	IL6|PIK3CA|ATM|RB1|KRAS	http://www.genome.jp/kegg-bin/show_pathway?mmu04218/mmu:18706%09red/mmu:16653%09red/mmu:16193%09red/mmu:11920%09red/mmu:19645%09red
EGFR tyrosine kinase inhibitor resistance	KEGG PATHWAY	mmu01521	4	80	2.79e-06	1.82e-05	IL6|PIK3CA|VEGFA|KRAS	http://www.genome.jp/kegg-bin/show_pathway?mmu01521/mmu:18706%09red/mmu:16653%09red/mmu:16193%09red/mmu:22339%09red
PI3K-Akt signaling pathway	KEGG PATHWAY	mmu04151	6	358	3.79e-06	2.39e-05	PIK3CA|PRKAA2|PRKAA1|IL6|VEGFA|KRAS	http://www.genome.jp/kegg-bin/show_pathway?mmu04151/mmu:16653%09red/mmu:105787%09red/mmu:22339%09red/mmu:18706%09red/mmu:16193%09red/mmu:108079%09red
Longevity regulating pathway	KEGG PATHWAY	mmu04211	4	90	4.37e-06	2.58e-05	PIK3CA|PRKAA2|PRKAA1|KRAS	http://www.genome.jp/kegg-bin/show_pathway?mmu04211/mmu:18706%09red/mmu:16653%09red/mmu:105787%09red/mmu:108079%09red
Proteoglycans in cancer	KEGG PATHWAY	mmu05205	5	206	4.53e-06	2.58e-05	PIK3CA|KRAS|CAV1|VEGFA|CD44	http://www.genome.jp/kegg-bin/show_pathway?mmu05205/mmu:18706%09red/mmu:16653%09red/mmu:22339%09red/mmu:12389%09red/mmu:12505%09red
IL-17 signaling pathway	KEGG PATHWAY	mmu04657	4	91	4.56e-06	2.58e-05	IL6|MAPK9|CXCL2|TNFAIP3	http://www.genome.jp/kegg-bin/show_pathway?mmu04657/mmu:20310%09red/mmu:21929%09red/mmu:26420%09red/mmu:16193%09red
Endocrine resistance	KEGG PATHWAY	mmu01522	4	93	4.96e-06	2.72e-05	PIK3CA|MAPK9|RB1|KRAS	http://www.genome.jp/kegg-bin/show_pathway?mmu01522/mmu:18706%09red/mmu:16653%09red/mmu:26420%09red/mmu:19645%09red
Prostate cancer	KEGG PATHWAY	mmu05215	4	97	5.82e-06	3.09e-05	PIK3CA|ZEB1|RB1|KRAS	http://www.genome.jp/kegg-bin/show_pathway?mmu05215/mmu:18706%09red/mmu:16653%09red/mmu:19645%09red/mmu:21417%09red
C-type lectin receptor signaling pathway	KEGG PATHWAY	mmu04625	4	112	1.01e-05	5.19e-05	IL6|PIK3CA|MAPK9|KRAS	http://www.genome.jp/kegg-bin/show_pathway?mmu04625/mmu:18706%09red/mmu:16653%09red/mmu:26420%09red/mmu:16193%09red
Human cytomegalovirus infection	KEGG PATHWAY	mmu05163	5	256	1.27e-05	6.34e-05	IL6|PIK3CA|VEGFA|RB1|KRAS	http://www.genome.jp/kegg-bin/show_pathway?mmu05163/mmu:18706%09red/mmu:16653%09red/mmu:16193%09red/mmu:19645%09red/mmu:22339%09red
Relaxin signaling pathway	KEGG PATHWAY	mmu04926	4	131	1.83e-05	8.69e-05	PIK3CA|MAPK9|VEGFA|KRAS	http://www.genome.jp/kegg-bin/show_pathway?mmu04926/mmu:18706%09red/mmu:16653%09red/mmu:26420%09red/mmu:22339%09red
Bladder cancer	KEGG PATHWAY	mmu05219	3	41	1.84e-05	8.69e-05	VEGFA|RB1|KRAS	http://www.genome.jp/kegg-bin/show_pathway?mmu05219/mmu:16653%09red/mmu:19645%09red/mmu:22339%09red
Apoptosis	KEGG PATHWAY	mmu04210	4	136	2.11e-05	9.72e-05	PIK3CA|ATM|MAPK9|KRAS	http://www.genome.jp/kegg-bin/show_pathway?mmu04210/mmu:18706%09red/mmu:16653%09red/mmu:26420%09red/mmu:11920%09red
Measles	KEGG PATHWAY	mmu05162	4	144	2.63e-05	0.000117657	IL6|PIK3CA|MAPK9|TNFAIP3	http://www.genome.jp/kegg-bin/show_pathway?mmu05162/mmu:18706%09red/mmu:26420%09red/mmu:21929%09red/mmu:16193%09red
Type II diabetes mellitus	KEGG PATHWAY	mmu04930	3	48	2.88e-05	0.000125491	PIK3CA|MAPK9|SOCS1	http://www.genome.jp/kegg-bin/show_pathway?mmu04930/mmu:18706%09red/mmu:26420%09red/mmu:12703%09red
VEGF signaling pathway	KEGG PATHWAY	mmu04370	3	58	4.94e-05	0.000209724	PIK3CA|VEGFA|KRAS	http://www.genome.jp/kegg-bin/show_pathway?mmu04370/mmu:18706%09red/mmu:16653%09red/mmu:22339%09red
Hepatocellular carcinoma	KEGG PATHWAY	mmu05225	4	171	5.06e-05	0.000209724	PIK3CA|HMOX1|RB1|KRAS	http://www.genome.jp/kegg-bin/show_pathway?mmu05225/mmu:18706%09red/mmu:16653%09red/mmu:19645%09red/mmu:15368%09red
Human papillomavirus infection	KEGG PATHWAY	mmu05165	5	361	6.36e-05	0.000257228	PIK3CA|ATM|VEGFA|RB1|KRAS	http://www.genome.jp/kegg-bin/show_pathway?mmu05165/mmu:18706%09red/mmu:16653%09red/mmu:19645%09red/mmu:11920%09red/mmu:22339%09red
Glutathione metabolism	KEGG PATHWAY	mmu00480	3	64	6.54e-05	0.000258467	IDH1|GPX2|GCLC	http://www.genome.jp/kegg-bin/show_pathway?mmu00480/mmu:14629%09red/mmu:14776%09red/mmu:15926%09red
Non-small cell lung cancer	KEGG PATHWAY	mmu05223	3	66	7.14e-05	0.000275817	PIK3CA|RB1|KRAS	http://www.genome.jp/kegg-bin/show_pathway?mmu05223/mmu:18706%09red/mmu:16653%09red/mmu:19645%09red
Fc epsilon RI signaling pathway	KEGG PATHWAY	mmu04664	3	68	7.77e-05	0.00029372	PIK3CA|MAPK9|KRAS	http://www.genome.jp/kegg-bin/show_pathway?mmu04664/mmu:18706%09red/mmu:16653%09red/mmu:26420%09red
Focal adhesion	KEGG PATHWAY	mmu04510	4	199	8.99e-05	0.000331177	PIK3CA|MAPK9|VEGFA|CAV1	http://www.genome.jp/kegg-bin/show_pathway?mmu04510/mmu:18706%09red/mmu:26420%09red/mmu:12389%09red/mmu:22339%09red
Melanoma	KEGG PATHWAY	mmu05218	3	72	9.16e-05	0.000331177	PIK3CA|RB1|KRAS	http://www.genome.jp/kegg-bin/show_pathway?mmu05218/mmu:18706%09red/mmu:16653%09red/mmu:19645%09red
NOD-like receptor signaling pathway	KEGG PATHWAY	mmu04621	4	206	0.000102443	0.000357022	IL6|MAPK9|CXCL2|TNFAIP3	http://www.genome.jp/kegg-bin/show_pathway?mmu04621/mmu:20310%09red/mmu:21929%09red/mmu:26420%09red/mmu:16193%09red
Glioma	KEGG PATHWAY	mmu05214	3	75	0.000102906	0.000357022	PIK3CA|RB1|KRAS	http://www.genome.jp/kegg-bin/show_pathway?mmu05214/mmu:18706%09red/mmu:16653%09red/mmu:19645%09red
Chronic myeloid leukemia	KEGG PATHWAY	mmu05220	3	76	0.000106882	0.0003634	PIK3CA|RB1|KRAS	http://www.genome.jp/kegg-bin/show_pathway?mmu05220/mmu:18706%09red/mmu:16653%09red/mmu:19645%09red
Salmonella infection	KEGG PATHWAY	mmu05132	3	78	0.000115132	0.000383773	IL6|MAPK9|CXCL2	http://www.genome.jp/kegg-bin/show_pathway?mmu05132/mmu:20310%09red/mmu:26420%09red/mmu:16193%09red
ErbB signaling pathway	KEGG PATHWAY	mmu04012	3	84	0.000142342	0.000465348	PIK3CA|MAPK9|KRAS	http://www.genome.jp/kegg-bin/show_pathway?mmu04012/mmu:18706%09red/mmu:16653%09red/mmu:26420%09red
Colorectal cancer	KEGG PATHWAY	mmu05210	3	88	0.000162619	0.000513165	PIK3CA|MAPK9|KRAS	http://www.genome.jp/kegg-bin/show_pathway?mmu05210/mmu:18706%09red/mmu:16653%09red/mmu:26420%09red
Ras signaling pathway	KEGG PATHWAY	mmu04014	4	233	0.000163005	0.000513165	PIK3CA|MAPK9|VEGFA|KRAS	http://www.genome.jp/kegg-bin/show_pathway?mmu04014/mmu:18706%09red/mmu:16653%09red/mmu:26420%09red/mmu:22339%09red
Progesterone-mediated oocyte maturation	KEGG PATHWAY	mmu04914	3	90	0.000173424	0.000534933	PIK3CA|MAPK9|KRAS	http://www.genome.jp/kegg-bin/show_pathway?mmu04914/mmu:18706%09red/mmu:16653%09red/mmu:26420%09red
Hypertrophic cardiomyopathy (HCM)	KEGG PATHWAY	mmu05410	3	91	0.000178997	0.000534933	IL6|PRKAA2|PRKAA1	http://www.genome.jp/kegg-bin/show_pathway?mmu05410/mmu:16193%09red/mmu:105787%09red/mmu:108079%09red
Human immunodeficiency virus 1 infection	KEGG PATHWAY	mmu05170	4	239	0.00017936	0.000534933	PIK3CA|ATM|MAPK9|KRAS	http://www.genome.jp/kegg-bin/show_pathway?mmu05170/mmu:18706%09red/mmu:16653%09red/mmu:26420%09red/mmu:11920%09red
Hematopoietic cell lineage	KEGG PATHWAY	mmu04640	3	95	0.00020245	0.000593388	IL6|CD44|TFRC	http://www.genome.jp/kegg-bin/show_pathway?mmu04640/mmu:16193%09red/mmu:22042%09red/mmu:12505%09red
Toll-like receptor signaling pathway	KEGG PATHWAY	mmu04620	3	99	0.00022781	0.000645461	IL6|PIK3CA|MAPK9	http://www.genome.jp/kegg-bin/show_pathway?mmu04620/mmu:18706%09red/mmu:26420%09red/mmu:16193%09red
Choline metabolism in cancer	KEGG PATHWAY	mmu05231	3	99	0.00022781	0.000645461	PIK3CA|MAPK9|KRAS	http://www.genome.jp/kegg-bin/show_pathway?mmu05231/mmu:18706%09red/mmu:16653%09red/mmu:26420%09red
Chagas disease (American trypanosomiasis)	KEGG PATHWAY	mmu05142	3	103	0.000255142	0.000699582	IL6|PIK3CA|MAPK9	http://www.genome.jp/kegg-bin/show_pathway?mmu05142/mmu:18706%09red/mmu:26420%09red/mmu:16193%09red
T cell receptor signaling pathway	KEGG PATHWAY	mmu04660	3	103	0.000255142	0.000699582	PIK3CA|MAPK9|KRAS	http://www.genome.jp/kegg-bin/show_pathway?mmu04660/mmu:18706%09red/mmu:16653%09red/mmu:26420%09red
Glucagon signaling pathway	KEGG PATHWAY	mmu04922	3	105	0.000269567	0.000727404	SLC2A1|PRKAA1|PRKAA2	http://www.genome.jp/kegg-bin/show_pathway?mmu04922/mmu:20525%09red/mmu:105787%09red/mmu:108079%09red
NF-kappa B signaling pathway	KEGG PATHWAY	mmu04064	3	109	0.000299978	0.000796817	CXCL2|ATM|TNFAIP3	http://www.genome.jp/kegg-bin/show_pathway?mmu04064/mmu:20310%09red/mmu:21929%09red/mmu:11920%09red
Thyroid hormone signaling pathway	KEGG PATHWAY	mmu04919	3	118	0.000376292	0.00098415	PIK3CA|SLC2A1|KRAS	http://www.genome.jp/kegg-bin/show_pathway?mmu04919/mmu:18706%09red/mmu:16653%09red/mmu:20525%09red
Neurotrophin signaling pathway	KEGG PATHWAY	mmu04722	3	121	0.000404251	0.00104125	PIK3CA|MAPK9|KRAS	http://www.genome.jp/kegg-bin/show_pathway?mmu04722/mmu:18706%09red/mmu:16653%09red/mmu:26420%09red
Yersinia infection	KEGG PATHWAY	mmu05135	3	123	0.000423612	0.00107483	IL6|PIK3CA|MAPK9	http://www.genome.jp/kegg-bin/show_pathway?mmu05135/mmu:18706%09red/mmu:26420%09red/mmu:16193%09red
Sphingolipid signaling pathway	KEGG PATHWAY	mmu04071	3	124	0.000433512	0.00108378	PIK3CA|MAPK9|KRAS	http://www.genome.jp/kegg-bin/show_pathway?mmu04071/mmu:18706%09red/mmu:16653%09red/mmu:26420%09red
AMPK signaling pathway	KEGG PATHWAY	mmu04152	3	126	0.000453755	0.00111795	PIK3CA|PRKAA2|PRKAA1	http://www.genome.jp/kegg-bin/show_pathway?mmu04152/mmu:18706%09red/mmu:105787%09red/mmu:108079%09red
Osteoclast differentiation	KEGG PATHWAY	mmu04380	3	128	0.000474596	0.00115259	PIK3CA|MAPK9|SOCS1	http://www.genome.jp/kegg-bin/show_pathway?mmu04380/mmu:18706%09red/mmu:26420%09red/mmu:12703%09red
Apelin signaling pathway	KEGG PATHWAY	mmu04371	3	139	0.000600226	0.00143716	PRKAA2|PRKAA1|KRAS	http://www.genome.jp/kegg-bin/show_pathway?mmu04371/mmu:16653%09red/mmu:105787%09red/mmu:108079%09red
Circadian rhythm	KEGG PATHWAY	mmu04710	2	30	0.000632438	0.00149326	PRKAA2|PRKAA1	http://www.genome.jp/kegg-bin/show_pathway?mmu04710/mmu:105787%09red/mmu:108079%09red
Breast cancer	KEGG PATHWAY	mmu05224	3	147	0.000703763	0.0016389	PIK3CA|RB1|KRAS	http://www.genome.jp/kegg-bin/show_pathway?mmu05224/mmu:18706%09red/mmu:16653%09red/mmu:19645%09red
Gastric cancer	KEGG PATHWAY	mmu05226	3	150	0.000745337	0.00171226	PIK3CA|RB1|KRAS	http://www.genome.jp/kegg-bin/show_pathway?mmu05226/mmu:18706%09red/mmu:16653%09red/mmu:19645%09red
Oxytocin signaling pathway	KEGG PATHWAY	mmu04921	3	154	0.000803158	0.00182049	PRKAA2|PRKAA1|KRAS	http://www.genome.jp/kegg-bin/show_pathway?mmu04921/mmu:16653%09red/mmu:105787%09red/mmu:108079%09red
Hepatitis C	KEGG PATHWAY	mmu05160	3	160	0.000895118	0.00200224	PIK3CA|RB1|KRAS	http://www.genome.jp/kegg-bin/show_pathway?mmu05160/mmu:18706%09red/mmu:16653%09red/mmu:19645%09red
Influenza A	KEGG PATHWAY	mmu05164	3	164	0.000959987	0.00211945	IL6|PIK3CA|IL33	http://www.genome.jp/kegg-bin/show_pathway?mmu05164/mmu:18706%09red/mmu:16193%09red/mmu:77125%09red
Jak-STAT signaling pathway	KEGG PATHWAY	mmu04630	3	165	0.000976657	0.00212767	IL6|PIK3CA|SOCS1	http://www.genome.jp/kegg-bin/show_pathway?mmu04630/mmu:18706%09red/mmu:16193%09red/mmu:12703%09red
Aldosterone-regulated sodium reabsorption	KEGG PATHWAY	mmu04960	2	38	0.000988741	0.00212767	PIK3CA|KRAS	http://www.genome.jp/kegg-bin/show_pathway?mmu04960/mmu:18706%09red/mmu:16653%09red
Tight junction	KEGG PATHWAY	mmu04530	3	167	0.00101055	0.00214741	MAPK9|PRKAA2|PRKAA1	http://www.genome.jp/kegg-bin/show_pathway?mmu04530/mmu:26420%09red/mmu:105787%09red/mmu:108079%09red
Transcriptional misregulation in cancer	KEGG PATHWAY	mmu05202	3	183	0.00130869	0.00274663	IL6|ATM|ZEB1	http://www.genome.jp/kegg-bin/show_pathway?mmu05202/mmu:21417%09red/mmu:16193%09red/mmu:11920%09red
Chemokine signaling pathway	KEGG PATHWAY	mmu04062	3	200	0.00168056	0.00348409	PIK3CA|CXCL2|KRAS	http://www.genome.jp/kegg-bin/show_pathway?mmu04062/mmu:18706%09red/mmu:16653%09red/mmu:20310%09red
Cysteine and methionine metabolism	KEGG PATHWAY	mmu00270	2	52	0.00179544	0.00367741	GCLC|CDO1	http://www.genome.jp/kegg-bin/show_pathway?mmu00270/mmu:12583%09red/mmu:14629%09red
Rap1 signaling pathway	KEGG PATHWAY	mmu04015	3	214	0.00203183	0.00411204	PIK3CA|VEGFA|KRAS	http://www.genome.jp/kegg-bin/show_pathway?mmu04015/mmu:18706%09red/mmu:16653%09red/mmu:22339%09red
Legionellosis	KEGG PATHWAY	mmu05134	2	58	0.00221104	0.00437067	IL6|CXCL2	http://www.genome.jp/kegg-bin/show_pathway?mmu05134/mmu:20310%09red/mmu:16193%09red
Endometrial cancer	KEGG PATHWAY	mmu05213	2	58	0.00221104	0.00437067	PIK3CA|KRAS	http://www.genome.jp/kegg-bin/show_pathway?mmu05213/mmu:18706%09red/mmu:16653%09red
Viral carcinogenesis	KEGG PATHWAY	mmu05203	3	231	0.00251582	0.00491597	PIK3CA|RB1|KRAS	http://www.genome.jp/kegg-bin/show_pathway?mmu05203/mmu:18706%09red/mmu:16653%09red/mmu:19645%09red
Thermogenesis	KEGG PATHWAY	mmu04714	3	232	0.00254631	0.00491901	PRKAA2|PRKAA1|KRAS	http://www.genome.jp/kegg-bin/show_pathway?mmu04714/mmu:16653%09red/mmu:105787%09red/mmu:108079%09red
Mitophagy - animal	KEGG PATHWAY	mmu04137	2	63	0.0025888	0.00494489	MAPK9|KRAS	http://www.genome.jp/kegg-bin/show_pathway?mmu04137/mmu:16653%09red/mmu:26420%09red
Cytosolic DNA-sensing pathway	KEGG PATHWAY	mmu04623	2	64	0.00266774	0.00503907	IL6|IL33	http://www.genome.jp/kegg-bin/show_pathway?mmu04623/mmu:16193%09red/mmu:77125%09red
Acute myeloid leukemia	KEGG PATHWAY	mmu05221	2	69	0.00307931	0.00575256	PIK3CA|KRAS	http://www.genome.jp/kegg-bin/show_pathway?mmu05221/mmu:18706%09red/mmu:16653%09red
Bacterial invasion of epithelial cells	KEGG PATHWAY	mmu05100	2	74	0.00351871	0.00650197	PIK3CA|CAV1	http://www.genome.jp/kegg-bin/show_pathway?mmu05100/mmu:18706%09red/mmu:12389%09red
Pertussis	KEGG PATHWAY	mmu05133	2	76	0.0037022	0.00676746	IL6|MAPK9	http://www.genome.jp/kegg-bin/show_pathway?mmu05133/mmu:26420%09red/mmu:16193%09red
Platinum drug resistance	KEGG PATHWAY	mmu01524	2	77	0.00379558	0.00686435	PIK3CA|ATM	http://www.genome.jp/kegg-bin/show_pathway?mmu01524/mmu:18706%09red/mmu:11920%09red
Endocytosis	KEGG PATHWAY	mmu04144	3	270	0.00387938	0.00694204	TFRC|CHMP5|CAV1	http://www.genome.jp/kegg-bin/show_pathway?mmu04144/mmu:76959%09red/mmu:12389%09red/mmu:22042%09red
B cell receptor signaling pathway	KEGG PATHWAY	mmu04662	2	83	0.00437875	0.00775404	PIK3CA|KRAS	http://www.genome.jp/kegg-bin/show_pathway?mmu04662/mmu:18706%09red/mmu:16653%09red
Rheumatoid arthritis	KEGG PATHWAY	mmu05323	2	84	0.00447973	0.00785107	IL6|VEGFA	http://www.genome.jp/kegg-bin/show_pathway?mmu05323/mmu:16193%09red/mmu:22339%09red
PD-L1 expression and PD-1 checkpoint pathway in cancer	KEGG PATHWAY	mmu05235	2	88	0.00489438	0.00842192	PIK3CA|KRAS	http://www.genome.jp/kegg-bin/show_pathway?mmu05235/mmu:18706%09red/mmu:16653%09red
MAPK signaling pathway	KEGG PATHWAY	mmu04010	3	294	0.00490453	0.00842192	MAPK9|VEGFA|KRAS	http://www.genome.jp/kegg-bin/show_pathway?mmu04010/mmu:16653%09red/mmu:26420%09red/mmu:22339%09red
Cytokine-cytokine receptor interaction	KEGG PATHWAY	mmu04060	3	296	0.00499663	0.00849427	IL6|CXCL2|IL33	http://www.genome.jp/kegg-bin/show_pathway?mmu04060/mmu:20310%09red/mmu:77125%09red/mmu:16193%09red
GnRH signaling pathway	KEGG PATHWAY	mmu04912	2	90	0.00510811	0.00859781	MAPK9|KRAS	http://www.genome.jp/kegg-bin/show_pathway?mmu04912/mmu:16653%09red/mmu:26420%09red
Small cell lung cancer	KEGG PATHWAY	mmu05222	2	92	0.00532607	0.00887679	PIK3CA|RB1	http://www.genome.jp/kegg-bin/show_pathway?mmu05222/mmu:18706%09red/mmu:19645%09red
Th17 cell differentiation	KEGG PATHWAY	mmu04659	2	102	0.00647883	0.0106854	IL6|MAPK9	http://www.genome.jp/kegg-bin/show_pathway?mmu04659/mmu:26420%09red/mmu:16193%09red
Amoebiasis	KEGG PATHWAY	mmu05146	2	103	0.00659981	0.0106854	IL6|PIK3CA	http://www.genome.jp/kegg-bin/show_pathway?mmu05146/mmu:18706%09red/mmu:16193%09red
Viral protein interaction with cytokine and cytokine receptor	KEGG PATHWAY	mmu04061	2	103	0.00659981	0.0106854	IL6|CXCL2	http://www.genome.jp/kegg-bin/show_pathway?mmu04061/mmu:20310%09red/mmu:16193%09red
Toxoplasmosis	KEGG PATHWAY	mmu05145	2	108	0.00722011	0.0114937	MAPK9|SOCS1	http://www.genome.jp/kegg-bin/show_pathway?mmu05145/mmu:26420%09red/mmu:12703%09red
Metabolic pathways	KEGG PATHWAY	mmu01100	6	1494	0.00723427	0.0114937	PIK3CA|IDH1|HMOX1|GCLC|CDO1|GPX2	http://www.genome.jp/kegg-bin/show_pathway?mmu01100/mmu:15368%09red/mmu:12583%09red/mmu:14629%09red/mmu:18706%09red/mmu:14776%09red/mmu:15926%09red
Cholinergic synapse	KEGG PATHWAY	mmu04725	2	113	0.00786582	0.0123814	PIK3CA|KRAS	http://www.genome.jp/kegg-bin/show_pathway?mmu04725/mmu:18706%09red/mmu:16653%09red
Natural killer cell mediated cytotoxicity	KEGG PATHWAY	mmu04650	2	118	0.00853663	0.013314	PIK3CA|KRAS	http://www.genome.jp/kegg-bin/show_pathway?mmu04650/mmu:18706%09red/mmu:16653%09red
Cell cycle	KEGG PATHWAY	mmu04110	2	123	0.00923225	0.014268	ATM|RB1	http://www.genome.jp/kegg-bin/show_pathway?mmu04110/mmu:11920%09red/mmu:19645%09red
Inflammatory mediator regulation of TRP channels	KEGG PATHWAY	mmu04750	2	127	0.0098064	0.0150188	PIK3CA|MAPK9	http://www.genome.jp/kegg-bin/show_pathway?mmu04750/mmu:18706%09red/mmu:26420%09red
Estrogen signaling pathway	KEGG PATHWAY	mmu04915	2	134	0.0108485	0.0164664	PIK3CA|KRAS	http://www.genome.jp/kegg-bin/show_pathway?mmu04915/mmu:18706%09red/mmu:16653%09red
Signaling pathways regulating pluripotency of stem cells	KEGG PATHWAY	mmu04550	2	138	0.011465	0.0172483	PIK3CA|KRAS	http://www.genome.jp/kegg-bin/show_pathway?mmu04550/mmu:18706%09red/mmu:16653%09red
Phospholipase D signaling pathway	KEGG PATHWAY	mmu04072	2	149	0.0132381	0.019741	PIK3CA|KRAS	http://www.genome.jp/kegg-bin/show_pathway?mmu04072/mmu:18706%09red/mmu:16653%09red
Taurine and hypotaurine metabolism	KEGG PATHWAY	mmu00430	1	11	0.0137729	0.02036	CDO1	http://www.genome.jp/kegg-bin/show_pathway?mmu00430/mmu:12583%09red
Tuberculosis	KEGG PATHWAY	mmu05152	2	178	0.0184388	0.0270225	IL6|MAPK9	http://www.genome.jp/kegg-bin/show_pathway?mmu05152/mmu:26420%09red/mmu:16193%09red
Axon guidance	KEGG PATHWAY	mmu04360	2	180	0.0188247	0.0273521	PIK3CA|KRAS	http://www.genome.jp/kegg-bin/show_pathway?mmu04360/mmu:18706%09red/mmu:16653%09red
2-Oxocarboxylic acid metabolism	KEGG PATHWAY	mmu01210	1	19	0.0228517	0.0329219	IDH1	http://www.genome.jp/kegg-bin/show_pathway?mmu01210/mmu:15926%09red
cAMP signaling pathway	KEGG PATHWAY	mmu04024	2	213	0.0256712	0.0366732	PIK3CA|MAPK9	http://www.genome.jp/kegg-bin/show_pathway?mmu04024/mmu:18706%09red/mmu:26420%09red
Regulation of actin cytoskeleton	KEGG PATHWAY	mmu04810	2	217	0.0265606	0.0376276	PIK3CA|KRAS	http://www.genome.jp/kegg-bin/show_pathway?mmu04810/mmu:18706%09red/mmu:16653%09red
Antifolate resistance	KEGG PATHWAY	mmu01523	1	30	0.0352018	0.049457	IL6	http://www.genome.jp/kegg-bin/show_pathway?mmu01523/mmu:16193%09red
Apoptosis - multiple species	KEGG PATHWAY	mmu04215	1	32	0.0374308	0.0513164	MAPK9	http://www.genome.jp/kegg-bin/show_pathway?mmu04215/mmu:26420%09red
Autophagy - other	KEGG PATHWAY	mmu04136	1	32	0.0374308	0.0513164	ATG3	http://www.genome.jp/kegg-bin/show_pathway?mmu04136/mmu:67841%09red
Citrate cycle (TCA cycle)	KEGG PATHWAY	mmu00020	1	32	0.0374308	0.0513164	IDH1	http://www.genome.jp/kegg-bin/show_pathway?mmu00020/mmu:15926%09red
Prion diseases	KEGG PATHWAY	mmu05020	1	34	0.0396548	0.0539305	IL6	http://www.genome.jp/kegg-bin/show_pathway?mmu05020/mmu:16193%09red
Base excision repair	KEGG PATHWAY	mmu03410	1	35	0.0407649	0.0550002	HMGB1	http://www.genome.jp/kegg-bin/show_pathway?mmu03410/mmu:15289%09red
Thyroid cancer	KEGG PATHWAY	mmu05216	1	37	0.0429813	0.0575341	KRAS	http://www.genome.jp/kegg-bin/show_pathway?mmu05216/mmu:16653%09red
African trypanosomiasis	KEGG PATHWAY	mmu05143	1	39	0.0451928	0.0600217	IL6	http://www.genome.jp/kegg-bin/show_pathway?mmu05143/mmu:16193%09red
Porphyrin and chlorophyll metabolism	KEGG PATHWAY	mmu00860	1	41	0.0473992	0.0619836	HMOX1	http://www.genome.jp/kegg-bin/show_pathway?mmu00860/mmu:15368%09red
Homologous recombination	KEGG PATHWAY	mmu03440	1	41	0.0473992	0.0619836	ATM	http://www.genome.jp/kegg-bin/show_pathway?mmu03440/mmu:11920%09red
Intestinal immune network for IgA production	KEGG PATHWAY	mmu04672	1	43	0.0496007	0.0638797	IL6	http://www.genome.jp/kegg-bin/show_pathway?mmu04672/mmu:16193%09red
Carbohydrate digestion and absorption	KEGG PATHWAY	mmu04973	1	43	0.0496007	0.0638797	PIK3CA	http://www.genome.jp/kegg-bin/show_pathway?mmu04973/mmu:18706%09red
Mineral absorption	KEGG PATHWAY	mmu04978	1	47	0.0539888	0.0690082	HMOX1	http://www.genome.jp/kegg-bin/show_pathway?mmu04978/mmu:15368%09red
Malaria	KEGG PATHWAY	mmu05144	1	55	0.0627055	0.0795518	IL6	http://www.genome.jp/kegg-bin/show_pathway?mmu05144/mmu:16193%09red
Regulation of lipolysis in adipocytes	KEGG PATHWAY	mmu04923	1	56	0.0637896	0.0803276	PIK3CA	http://www.genome.jp/kegg-bin/show_pathway?mmu04923/mmu:18706%09red
Inflammatory bowel disease (IBD)	KEGG PATHWAY	mmu05321	1	59	0.0670344	0.083793	IL6	http://www.genome.jp/kegg-bin/show_pathway?mmu05321/mmu:16193%09red
Long-term depression	KEGG PATHWAY	mmu04730	1	61	0.0691915	0.0858581	KRAS	http://www.genome.jp/kegg-bin/show_pathway?mmu04730/mmu:16653%09red
Graft-versus-host disease	KEGG PATHWAY	mmu05332	1	65	0.0734912	0.0905326	IL6	http://www.genome.jp/kegg-bin/show_pathway?mmu05332/mmu:16193%09red
Long-term potentiation	KEGG PATHWAY	mmu04720	1	67	0.0756337	0.0925016	KRAS	http://www.genome.jp/kegg-bin/show_pathway?mmu04720/mmu:16653%09red
RIG-I-like receptor signaling pathway	KEGG PATHWAY	mmu04622	1	68	0.0767031	0.0931395	MAPK9	http://www.genome.jp/kegg-bin/show_pathway?mmu04622/mmu:26420%09red
p53 signaling pathway	KEGG PATHWAY	mmu04115	1	71	0.0799042	0.0963384	ATM	http://www.genome.jp/kegg-bin/show_pathway?mmu04115/mmu:11920%09red
Bile secretion	KEGG PATHWAY	mmu04976	1	72	0.0809688	0.0968436	SLC2A1	http://www.genome.jp/kegg-bin/show_pathway?mmu04976/mmu:20525%09red
Thyroid hormone synthesis	KEGG PATHWAY	mmu04918	1	73	0.0820323	0.0968436	GPX2	http://www.genome.jp/kegg-bin/show_pathway?mmu04918/mmu:14776%09red
Inositol phosphate metabolism	KEGG PATHWAY	mmu00562	1	73	0.0820323	0.0968436	PIK3CA	http://www.genome.jp/kegg-bin/show_pathway?mmu00562/mmu:18706%09red
Biosynthesis of amino acids	KEGG PATHWAY	mmu01230	1	78	0.0873313	0.102388	IDH1	http://www.genome.jp/kegg-bin/show_pathway?mmu01230/mmu:15926%09red
Herpes simplex virus 1 infection	KEGG PATHWAY	mmu05168	2	439	0.092067	0.107201	IL6|PIK3CA	http://www.genome.jp/kegg-bin/show_pathway?mmu05168/mmu:18706%09red/mmu:16193%09red
Peroxisome	KEGG PATHWAY	mmu04146	1	84	0.0936507	0.108304	IDH1	http://www.genome.jp/kegg-bin/show_pathway?mmu04146/mmu:15926%09red
ECM-receptor interaction	KEGG PATHWAY	mmu04512	1	86	0.0957477	0.108514	CD44	http://www.genome.jp/kegg-bin/show_pathway?mmu04512/mmu:12505%09red
Gap junction	KEGG PATHWAY	mmu04540	1	86	0.0957477	0.108514	KRAS	http://www.genome.jp/kegg-bin/show_pathway?mmu04540/mmu:16653%09red
Insulin secretion	KEGG PATHWAY	mmu04911	1	86	0.0957477	0.108514	SLC2A1	http://www.genome.jp/kegg-bin/show_pathway?mmu04911/mmu:20525%09red
Th1 and Th2 cell differentiation	KEGG PATHWAY	mmu04658	1	87	0.0967944	0.108974	MAPK9	http://www.genome.jp/kegg-bin/show_pathway?mmu04658/mmu:26420%09red
Arachidonic acid metabolism	KEGG PATHWAY	mmu00590	1	89	0.0988842	0.109871	GPX2	http://www.genome.jp/kegg-bin/show_pathway?mmu00590/mmu:14776%09red
Viral myocarditis	KEGG PATHWAY	mmu05416	1	89	0.0988842	0.109871	CAV1	http://www.genome.jp/kegg-bin/show_pathway?mmu05416/mmu:12389%09red
Protein digestion and absorption	KEGG PATHWAY	mmu04974	1	90	0.0999274	0.110309	DPP4	http://www.genome.jp/kegg-bin/show_pathway?mmu04974/mmu:13482%09red
Fc gamma R-mediated phagocytosis	KEGG PATHWAY	mmu04666	1	92	0.10201	0.111882	PIK3CA	http://www.genome.jp/kegg-bin/show_pathway?mmu04666/mmu:18706%09red
TGF-beta signaling pathway	KEGG PATHWAY	mmu04350	1	95	0.105125	0.11456	HAMP	http://www.genome.jp/kegg-bin/show_pathway?mmu04350/mmu:84506%09red
Phosphatidylinositol signaling system	KEGG PATHWAY	mmu04070	1	98	0.10823	0.117192	PIK3CA	http://www.genome.jp/kegg-bin/show_pathway?mmu04070/mmu:18706%09red
Melanogenesis	KEGG PATHWAY	mmu04916	1	100	0.110294	0.118671	KRAS	http://www.genome.jp/kegg-bin/show_pathway?mmu04916/mmu:16653%09red
Leukocyte transendothelial migration	KEGG PATHWAY	mmu04670	1	115	0.125626	0.134317	PIK3CA	http://www.genome.jp/kegg-bin/show_pathway?mmu04670/mmu:18706%09red
Carbon metabolism	KEGG PATHWAY	mmu01200	1	121	0.131686	0.139916	IDH1	http://www.genome.jp/kegg-bin/show_pathway?mmu01200/mmu:15926%09red
Platelet activation	KEGG PATHWAY	mmu04611	1	125	0.135703	0.143289	PIK3CA	http://www.genome.jp/kegg-bin/show_pathway?mmu04611/mmu:18706%09red
Serotonergic synapse	KEGG PATHWAY	mmu04726	1	132	0.14269	0.149736	KRAS	http://www.genome.jp/kegg-bin/show_pathway?mmu04726/mmu:16653%09red
Dopaminergic synapse	KEGG PATHWAY	mmu04728	1	135	0.145667	0.151923	MAPK9	http://www.genome.jp/kegg-bin/show_pathway?mmu04728/mmu:26420%09red
Ubiquitin mediated proteolysis	KEGG PATHWAY	mmu04120	1	139	0.149621	0.155095	SOCS1	http://www.genome.jp/kegg-bin/show_pathway?mmu04120/mmu:12703%09red
Retrograde endocannabinoid signaling	KEGG PATHWAY	mmu04723	1	150	0.160403	0.165264	MAPK9	http://www.genome.jp/kegg-bin/show_pathway?mmu04723/mmu:26420%09red
Cushing syndrome	KEGG PATHWAY	mmu04934	1	159	0.169125	0.1732	RB1	http://www.genome.jp/kegg-bin/show_pathway?mmu04934/mmu:19645%09red
Wnt signaling pathway	KEGG PATHWAY	mmu04310	1	162	0.172012	0.175032	MAPK9	http://www.genome.jp/kegg-bin/show_pathway?mmu04310/mmu:26420%09red
Protein processing in endoplasmic reticulum	KEGG PATHWAY	mmu04141	1	163	0.172973	0.175032	MAPK9	http://www.genome.jp/kegg-bin/show_pathway?mmu04141/mmu:26420%09red
Phagosome	KEGG PATHWAY	mmu04145	1	181	0.190074	0.191199	TFRC	http://www.genome.jp/kegg-bin/show_pathway?mmu04145/mmu:22042%09red
Alcoholism	KEGG PATHWAY	mmu05034	1	199	0.206829	0.206829	KRAS	http://www.genome.jp/kegg-bin/show_pathway?mmu05034/mmu:16653%09red
KEGG, Kyoto Encyclopedia of Genes and Genomes.
